# Supplementary material for: Sex Differences in Rupture Risk and Mortality in Untreated Patients With Intact Abdominal Aortic Aneurysms
Source: PubMed Central journal article supplement — J Am Heart Assoc. 2021 Feb 23;10(5):e019592. doi: 10.1161/JAHA.120.019592 (PMC8174277; doi:10.1161/jaha.120.019592), 2021-02-23
Supplement: JAH3-10-e019592-s001.pdf [file JAH3-10-e019592-s001.pdf]

# **SUPPLEMENTAL MATERIAL**

**Table S1. Baseline demographics of men and women with untreated iAAAs 2001-2015.**

|                               | <b>All = 19 569</b> | <b>Men = 15 020 (77%)</b> | <b>Women = 4549 (23%)</b> |
|-------------------------------|---------------------|---------------------------|---------------------------|
| <b>Age</b>                    |                     |                           |                           |
| Mean age (SD)                 | 73.7 (8.6)          | 73.0 (8.5)                | 76.1 (8.5)                |
| <60 (n; %)                    | 746 (3.8)           | 587 (3.9)                 | 159 (3.5)                 |
| 60–69 (n; %)                  | 5963 (30.5)         | 5138 (34.2)               | 825 (18.1)                |
| 70–79 (n; %)                  | 7349 (37.6)         | 5500 (36.6)               | 1849 (40.6)               |
| ≥80 (n; %)                    | 5511 (28.2)         | 3795 (25.3)               | 1716 (37.7)               |
| <b>Comorbidity groups</b>     |                     |                           |                           |
| None or unknown (n; %)        | 4974 (25.4)         | 3921 (26.1)               | 1053 (23.1)               |
| Cardiovascular/renal (n; %) * | 5846 (29.9)         | 4667 (31.1)               | 1179 (25.9)               |
| Neurological (n; %) †         | 1122 (5.7)          | 873 (5.8)                 | 249 (5.5)                 |
| COPD (n; %)                   | 2476 (12.7)         | 1699 (11.3)               | 777 (17.1)                |
| Diabetes mellitus (n; %)      | 2260 (11.5)         | 1788 (11.9)               | 472 (10.4)                |
| Malignancy (n; %)             | 5845 (29.9)         | 4601 (30.6)               | 1244 (27.3)               |
| Other (n; %) ‡                | 9700 (49.6)         | 7311 (48.7)               | 2389 (52.5)               |
| <b>Household income</b>       |                     |                           |                           |
| Low (n; %)                    | 6824 (34.9)         | 4442 (29.6)               | 2382 (52.4)               |
| Middle (n; %)                 | 6391 (32.7)         | 5011 (33.4)               | 1380 (30.3)               |
| High (n; %)                   | 6354 (32.5)         | 5567 (37.1)               | 787 (17.3)                |
| <b>Marital status</b> §       |                     |                           |                           |
| Married (n; %)                | 10 703 (54.7)       | 9246 (61.6)               | 1457 (32.0)               |
| Unmarried (n; %)              | 5288 (27.0)         | 4038 (26.9)               | 1250 (27.5)               |
| Widowed (n; %)                | 3573 (18.3)         | 1731 (11.5)               | 1842 (40.5)               |
| <b>Year of diagnosis</b>      |                     |                           |                           |
| 2001–2003 (n; %)              | 2436 (12.4)         | 1714 (11.4)               | 722 (15.9)                |
| 2004–2006 (n; %)              | 2621 (13.4)         | 1848 (12.3)               | 773 (17.0)                |
| 2007–2009 (n; %)              | 3642 (18.6)         | 2716 (18.1)               | 926 (20.4)                |
| 2010–2012 (n; %)              | 5432 (27.8)         | 4402 (29.3)               | 1030 (22.6)               |
| 2013–2015 (n; %)              | 5438 (27.8)         | 4340 (28.9)               | 1098 (24.1)               |

\* Any of the following: cardiac disease, thoracic aortic aneurysm, aortic dissection, renal failure

† Stroke and/or dementia

‡ Any of the following: arrhythmia, hypertension, hyperlipidaemia, PAD

§ 5 (0.0) men missing.

iAAA = intact abdominal aortic aneurysm, SD = standard deviation, COPD = chronic obstructive pulmonary disease, PAD = peripheral artery disease

**Table S2. Unadjusted and adjusted associations between baseline demographics and the risk of rupture (1016 events) within 5 years among untreated patients with iAAAs. Significant adjusted risks are highlighted. \***

|                           | Unadjusted |            |        | Adjusted     |                   |                  |
|---------------------------|------------|------------|--------|--------------|-------------------|------------------|
|                           | HR         | 95% CI     | P      | HR           | 95% CI            | P                |
| <b>Sex</b>                |            |            |        |              |                   |                  |
| Men                       | Ref        | Ref        | Ref    | Ref          | Ref               | Ref              |
| Women                     | 1.81       | 1.59-2.06  | <0.001 | <b>1.23</b>  | <b>1.07-1.42</b>  | <b>0.004</b>     |
| <b>Age groups</b>         |            |            |        |              |                   |                  |
| <60                       | Ref        | Ref        | Ref    | Ref          | Ref               | Ref              |
| 60–69                     | 1.69       | 0.82-3.48  | 0.152  | 2.02         | 0.98-4.15         | 0.057            |
| 70–79                     | 4.96       | 2.46-10.00 | <0.001 | <b>4.41</b>  | <b>2.18-8.92</b>  | <b>&lt;0.001</b> |
| ≥80                       | 14.16      | 7.05-28.46 | <0.001 | <b>11.49</b> | <b>5.68-23.25</b> | <b>&lt;0.001</b> |
| <b>Comorbidity groups</b> |            |            |        |              |                   |                  |
| Cardiovascular/renal      | 0.96       | 0.84-1.10  | 0.586  | 1.01         | 0.88-1.16         | 0.876            |
| Neurological              | 0.85       | 0.63-1.15  | 0.295  | 0.85         | 0.62-1.15         | 0.293            |
| COPD                      | 1.43       | 1.20-1.70  | <0.001 | <b>1.36</b>  | <b>1.15-1.62</b>  | <b>&lt;0.001</b> |
| Diabetes mellitus         | 0.72       | 0.58-0.91  | 0.005  | 0.86         | 0.68-1.08         | 0.191            |
| Malignancy                | 1.06       | 0.93-1.21  | 0.393  | 0.99         | 0.87-1.14         | 0.919            |
| <b>Household income</b>   |            |            |        |              |                   |                  |
| Low                       | Ref        | Ref        | Ref    | Ref          | Ref               | Ref              |
| Middle                    | 0.66       | 0.58-0.76  | <0.001 | <b>0.81</b>  | <b>0.70-0.93</b>  | <b>0.004</b>     |
| High                      | 0.35       | 0.30-0.41  | <0.001 | <b>0.63</b>  | <b>0.53-0.75</b>  | <b>&lt;0.001</b> |
| <b>Marital status</b>     |            |            |        |              |                   |                  |
| Married                   | Ref        | Ref        | Ref    | Ref          | Ref               | Ref              |
| Unmarried                 | 0.82       | 0.69-0.96  | 0.016  | 0.93         | 0.78-1.10         | 0.383            |
| Widowed                   | 1.94       | 1.68-2.24  | <0.001 | 0.96         | 0.82-1.13         | 0.656            |
| <b>Period</b>             |            |            |        |              |                   |                  |
| 2001–2003                 | Ref        | Ref        | Ref    | Ref          | Ref               | Ref              |
| 2004–2006                 | 0.82       | 0.68-0.98  | 0.027  | <b>0.81</b>  | <b>0.67-0.97</b>  | <b>0.020</b>     |
| 2007–2009                 | 0.62       | 0.52-0.74  | <0.001 | <b>0.65</b>  | <b>0.54-0.77</b>  | <b>&lt;0.001</b> |
| 2010–2012                 | 0.31       | 0.26-0.38  | <0.001 | <b>0.41</b>  | <b>0.34-0.49</b>  | <b>&lt;0.001</b> |
| 2013–2015                 | 0.28       | 0.22-0.35  | <0.001 | <b>0.36</b>  | <b>0.28-0.46</b>  | <b>&lt;0.001</b> |

\* Five observations excluded due to missing marital status.

**Table S3. Unadjusted and adjusted associations between baseline demographics and the risk of death (7231 events) within 5 years among untreated patients with iAAAs. Significant adjusted risks are highlighted. \***

|                           | Unadjusted |           |        | Adjusted    |                  |                  |
|---------------------------|------------|-----------|--------|-------------|------------------|------------------|
|                           | HR         | 95% CI    | P      | HR          | 95% CI           | P                |
| <b>Sex</b>                |            |           |        |             |                  |                  |
| Men                       | Ref        | Ref       | Ref    | Ref         | Ref              | Ref              |
| Women                     | 1.36       | 1.29-1.43 | <0.001 | 0.95        | 0.89-1.00        | 0.054            |
| <b>Age groups</b>         |            |           |        |             |                  |                  |
| <60                       | Ref        | Ref       | Ref    | Ref         | Ref              | Ref              |
| 60–69                     | 1.28       | 1.05-1.58 | 0.017  | <b>1.48</b> | <b>1.20-1.81</b> | <b>&lt;0.001</b> |
| 70–79                     | 3.32       | 2.73-4.05 | <0.001 | <b>3.04</b> | <b>2.49-3.72</b> | <b>&lt;0.001</b> |
| ≥80                       | 7.16       | 5.88-8.72 | <0.001 | <b>6.26</b> | <b>5.12-7.65</b> | <b>&lt;0.001</b> |
| <b>Comorbidity groups</b> |            |           |        |             |                  |                  |
| Cardiovascular/renal      | 1.33       | 1.27-1.40 | <0.001 | <b>1.32</b> | <b>1.26-1.39</b> | <b>&lt;0.001</b> |
| Neurological              | 1.83       | 1.69-1.99 | <0.001 | <b>1.75</b> | <b>1.61-1.90</b> | <b>&lt;0.001</b> |
| COPD                      | 1.85       | 1.74-0.96 | <0.001 | <b>1.62</b> | <b>1.52-1.72</b> | <b>&lt;0.001</b> |
| Diabetes mellitus         | 1.08       | 0.95-1.21 | 0.235  | <b>1.13</b> | <b>1.01-1.27</b> | <b>0.041</b>     |
| Malignancy                | 1.40       | 1.33-1.47 | <0.001 | <b>1.28</b> | <b>1.22-1.35</b> | <b>&lt;0.001</b> |
| <b>Household income</b>   |            |           |        |             |                  |                  |
| Low                       | Ref        | Ref       | Ref    | Ref         | Ref              | Ref              |
| Middle                    | 0.75       | 0.72-0.80 | <0.001 | <b>0.88</b> | <b>0.84-0.93</b> | <b>&lt;0.001</b> |
| High                      | 0.44       | 0.41-0.46 | <0.001 | <b>0.72</b> | <b>0.68-0.77</b> | <b>&lt;0.001</b> |
| <b>Marital status</b>     |            |           |        |             |                  |                  |
| Married                   | Ref        | Ref       | Ref    | Ref         | Ref              | Ref              |
| Unmarried                 | 1.05       | 0.99-1.11 | 0.085  | <b>1.19</b> | <b>1.12-1.26</b> | <b>&lt;0.001</b> |
| Widowed                   | 1.98       | 1.87-2.09 | <0.001 | <b>1.25</b> | <b>1.18-1.33</b> | <b>&lt;0.001</b> |
| <b>Period</b>             |            |           |        |             |                  |                  |
| 2001–2003                 | Ref        | Ref       | Ref    | Ref         | Ref              | Ref              |
| 2004–2006                 | 0.91       | 0.85-0.98 | 0.015  | <b>0.86</b> | <b>0.80-0.93</b> | <b>&lt;0.001</b> |
| 2007–2009                 | 0.68       | 0.64-0.73 | <0.001 | <b>0.66</b> | <b>0.61-0.71</b> | <b>&lt;0.001</b> |
| 2010–2012                 | 0.47       | 0.44-0.50 | <0.001 | <b>0.54</b> | <b>0.50-0.58</b> | <b>&lt;0.001</b> |
| 2013–2015                 | 0.44       | 0.40-0.48 | <0.001 | <b>0.50</b> | <b>0.45-0.54</b> | <b>&lt;0.001</b> |

\* Five observations excluded due to missing marital status.

**Table S4. Demographics and AAA diameters in 120 women and 120 men under surveillance at outpatient vascular clinic.**

|                                          | <b>Total = 240</b> | <b>Men = 120</b> | <b>Women = 120</b> | <b>p</b> |
|------------------------------------------|--------------------|------------------|--------------------|----------|
| <b>Median age</b>                        | 78 (45)            | 76 (42)          | 79 (43)            | <0.05    |
| <b>Smoking</b>                           |                    |                  |                    |          |
| Ever                                     | 189 (81.5)         | 95 (81.2)        | 94 (81.7)          | 0.91     |
| Never                                    | 43 (18.5)          | 22 (18.8)        | 21 (18.3)          | 0.87     |
| <b>Comorbidities</b>                     |                    |                  |                    |          |
| Hypertension                             | 186 (77.5)         | 95 (79.2)        | 91 (75.8)          | 0.64     |
| Diabetes mellitus                        | 59 (24.6)          | 34 (28.3)        | 25 (20.8)          | 0.23     |
| Cardiac disease                          | 90 (37.7)          | 48 (40.3)        | 42 (35.0)          | 0.43     |
| Stroke/TIA                               | 34 (14.2)          | 21 (17.5)        | 13 (10.8)          | 0.20     |
| COPD                                     | 60 (25.0)          | 26 (21.7)        | 34 (28.3)          | 0.30     |
| <b>Medical treatment</b>                 |                    |                  |                    |          |
| Antiplatelet agents                      | 170 (70.8)         | 88 (73.3)        | 82 (68.3)          | 0.48     |
| Statins                                  | 142 (59.2)         | 78 (65.0)        | 64 (53.3)          | 0.08     |
| <b>Body size &amp; Aortic morphology</b> |                    |                  |                    |          |
| Weight (kg)                              | 75 (85)            | 85 (65)          | 65.5 (75)          | <0.05    |
| Height (m)                               | 1.72 (0.58)        | 1.78 (0.37)      | 1.64 (0.34)        | <0.05    |
| Aortic diameter (mm)                     | 42 (37)            | 43 (37)          | 41.5 (30)          | 0.21     |
| BMI (kg/m <sup>2</sup> )                 | 26 (25)            | 27 (20)          | 24 (25)            | <0.05    |
| BSA (m <sup>2</sup> )                    | 1.9 (3.7)          | 2.0 (3.3)        | 1.7 (3.7)          | <0.05    |
| ASI (cm/m <sup>2</sup> )                 | 2.2 (3.7)          | 2.1 (3.7)        | 2.4 (3.5)          | <0.05    |

---

Variables summarized by medians with interquartile range or percentages for categorical variables.

AAA = abdominal aortic aneurysm, BMI = body mass index, BSA = body surface area, ASI = aortic size index, GFR = glomerular filtration rate (ml/min), TIA = transient ischemic attack, COPD = chronic obstructive pulmonary disease.

**Figure S1. Time to death for untreated men and women with iAAAs presented in the four age groups of A) <60 years B) 60-69 years C) 70-79 years D) ≥80 years.**

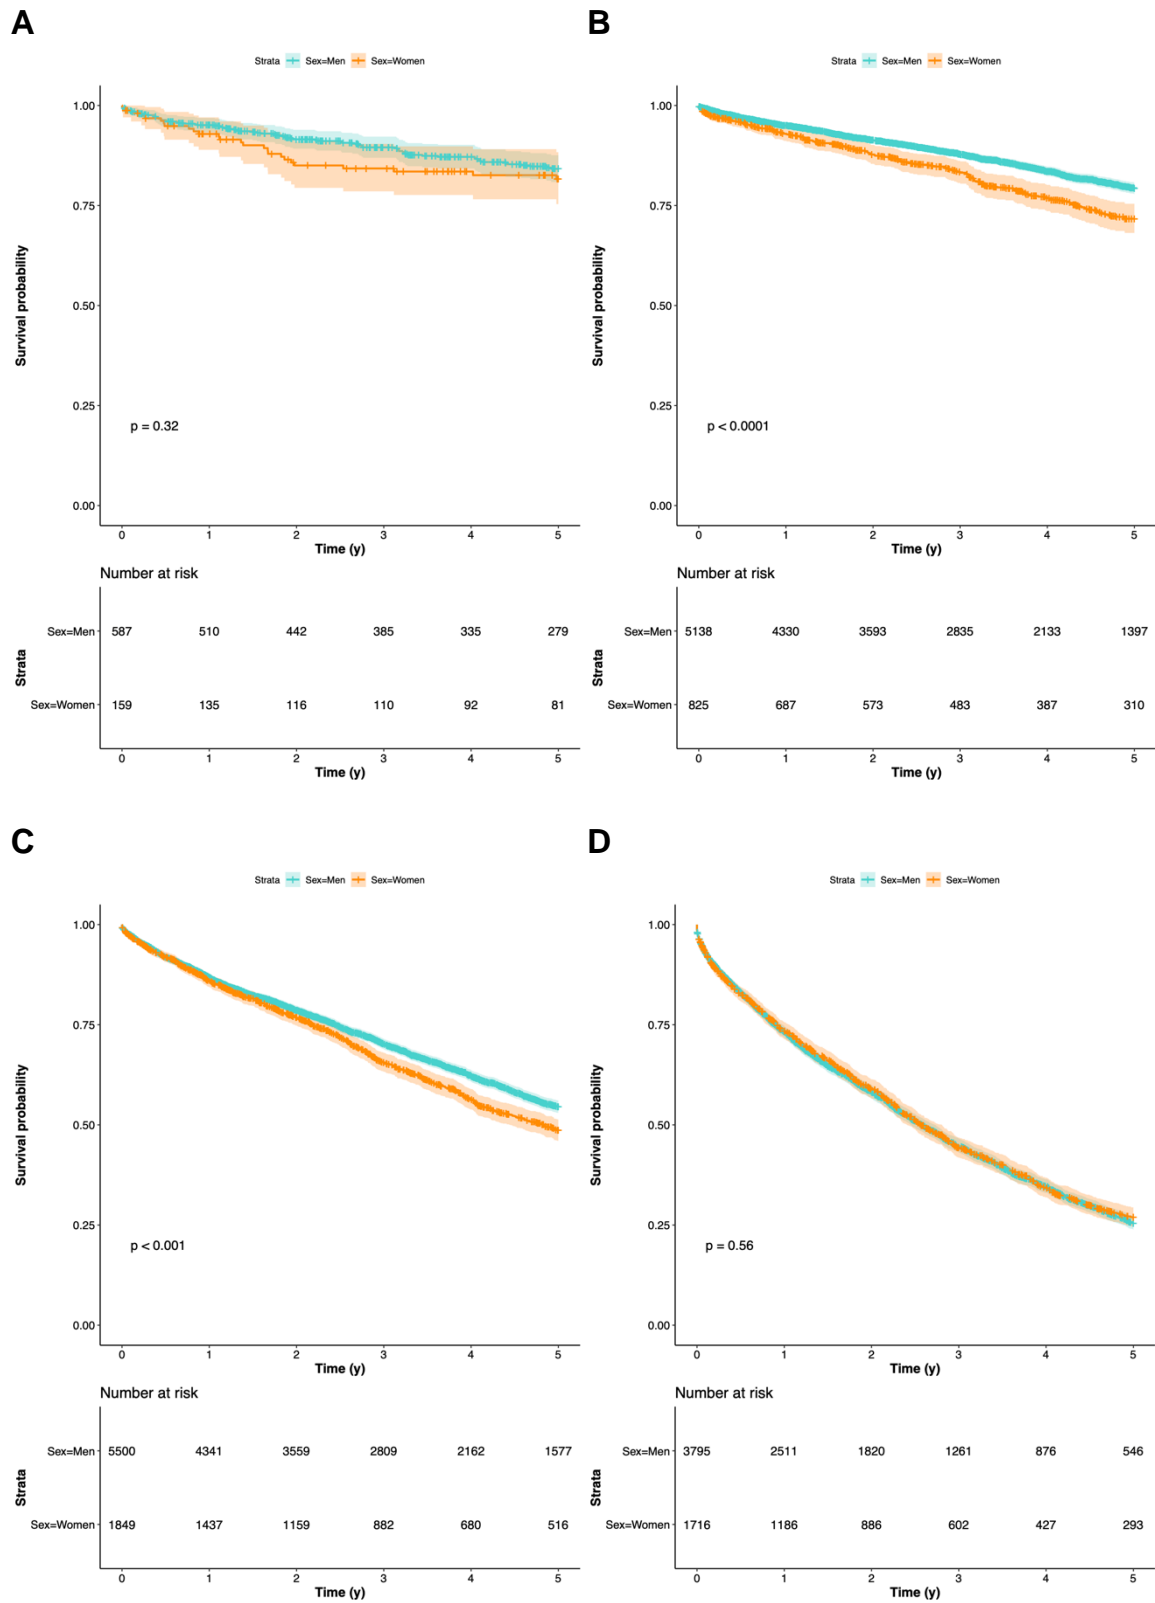

**Figure S2. Age distributions of untreated men and women with rupture within 5 years after diagnosis. \***

\* All patients with rupture within 5 years included regardless of year of diagnosis.

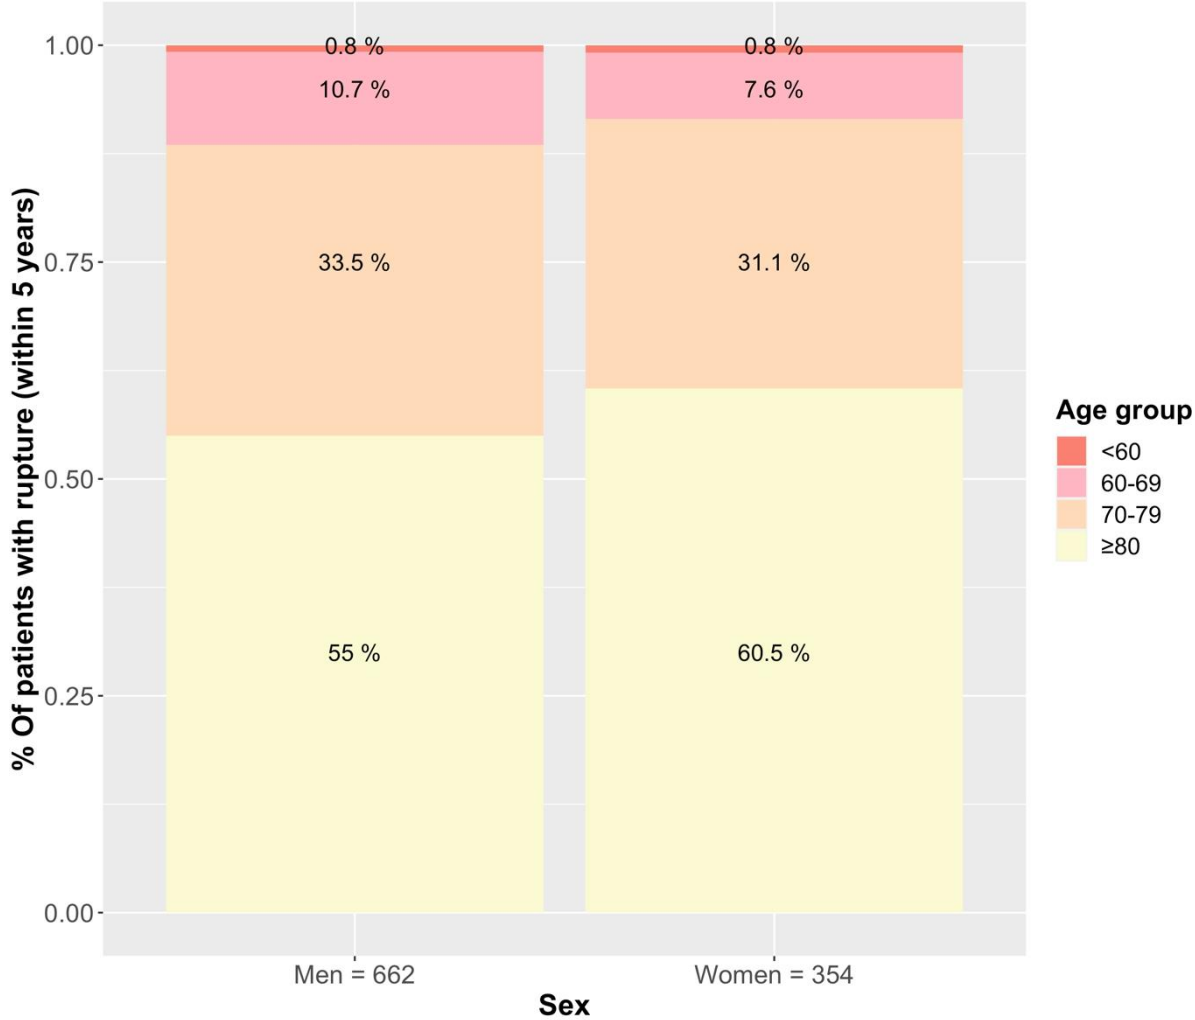

**Figure S3. Top 5 causes of death among untreated men and women deceased within 5 years of iAAA diagnosis.**

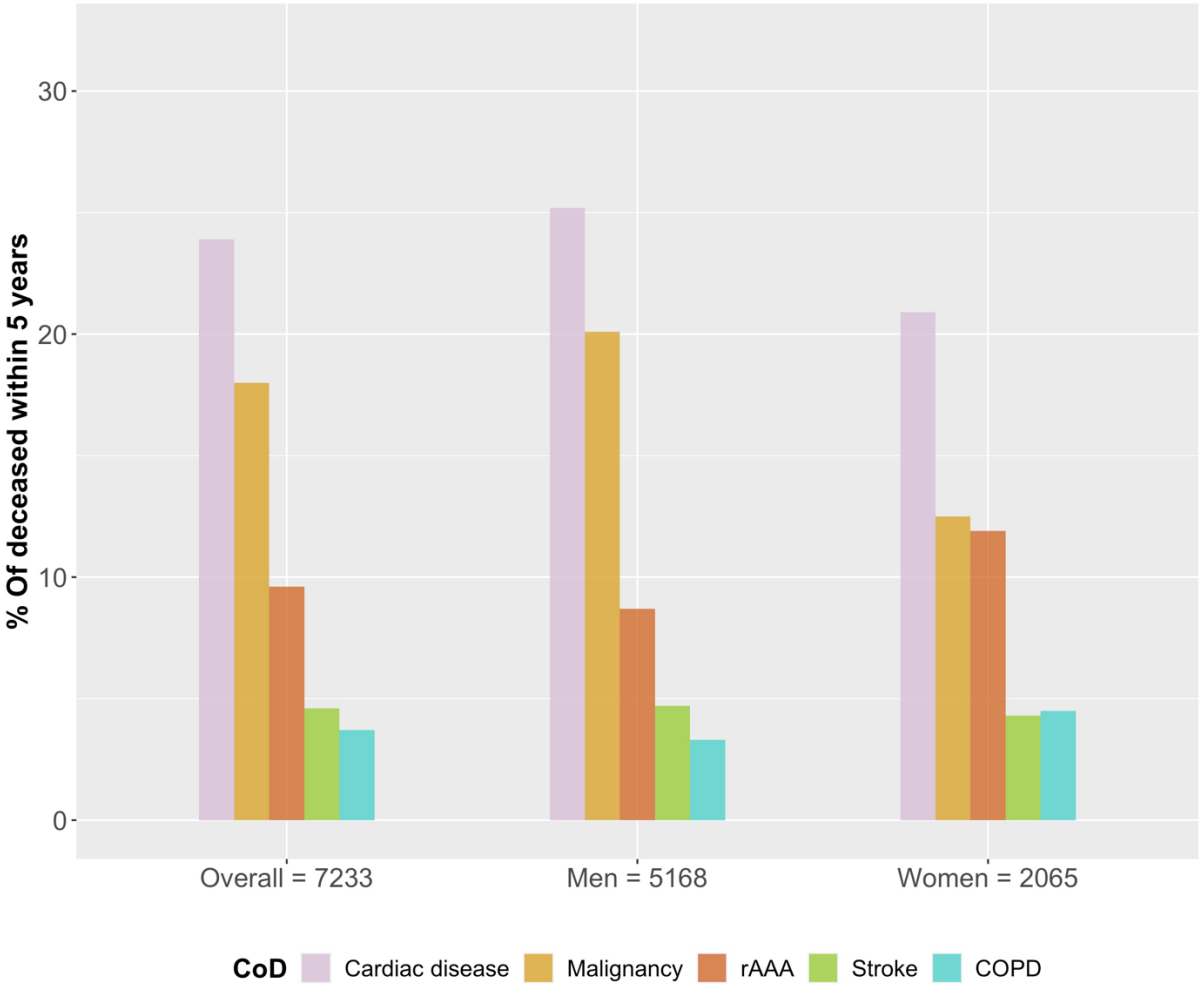

ICD codes for CoDs in untreated cohort Cardiac disease = I20-I25X, I42-I43, I50, I11.0, I13.0 Malignancy = CX rAAA = I71.3 Stroke = I61X, I63-I64X, I69X COPD = J44X

CoD = cause of death, COPD = chronic obstructive pulmonary disease, rAAA = ruptured abdominal aortic aneurysm, ICD = International Classification of Diseases
